# Supplementary material
Source: PubMed Central journal article supplement (PMC9294565)
Supplement: sj-pdf-1-dst-10.1177_1932296820985567.pdf [file sj-pdf-1-dst-10.1177_1932296820985567.pdf]

## Supplementary material

**Table 1. Algorithm sensitivity and specificity thresholds**

| Threshold    | mtmDR Sensitivity | mtmDR Specificity |
|--------------|-------------------|-------------------|
| 0.000        | 1.000             | 0.000             |
| 0.050        | 1.000             | 0.055             |
| 0.100        | 1.000             | 0.129             |
| 0.150        | 1.000             | 0.186             |
| 0.200        | 1.000             | 0.204             |
| 0.250        | 1.000             | 0.220             |
| 0.300        | 1.000             | 0.244             |
| 0.350        | 1.000             | 0.269             |
| 0.400        | 0.995             | 0.305             |
| 0.450        | 0.995             | 0.343             |
| 0.500        | 0.995             | 0.374             |
| 0.550        | 0.995             | 0.428             |
| 0.600        | 0.989             | 0.457             |
| 0.650        | 0.978             | 0.515             |
| 0.700        | 0.978             | 0.564             |
| <b>0.750</b> | <b>0.978</b>      | <b>0.614</b>      |
| 0.800        | 0.935             | 0.689             |
| 0.850        | 0.924             | 0.733             |
| 0.900        | 0.848             | 0.800             |
| 0.950        | 0.772             | 0.881             |
| 1.000        | 0.000             | 1.000             |

Algorithm sensitivity and specificity values in 20 different thresholds. The operation point was set to 0.75 for a high sensitivity in order to avoid false negative cases. These information are shown graphically on Figure 3.

mtmDR: more than mild diabetic retinopathy
